# Supplementary material
Source: PubMed Central journal article supplement (PMC6161044)
Supplement: oc8b00488_si_001.pdf [file oc8b00488_si_001.pdf]

# Structural and mechanistic insights into the catalytic domain-mediated short-range glycosylation preferences of GalNAc-T4

Matilde de las Rivas<sup>1,12</sup>, Earnest James Paul Daniel<sup>2,12</sup>, Helena Coelho<sup>3,4</sup>, Erandi Lira-Navarrete<sup>5</sup>, Lluís Raich<sup>6</sup>, Ismael Compañón<sup>7</sup>, Ana Diniz<sup>3</sup>, Laura Lagartera<sup>8</sup>, Jesús Jiménez-Barbero<sup>4,9</sup>, Henrik Clausen<sup>3</sup>, Carme Rovira<sup>6,10</sup>, Filipa Marcelo<sup>3</sup>, Francisco Corzana<sup>7</sup>, Thomas A. Gerken<sup>2\*</sup>, and Ramon Hurtado-Guerrero<sup>1,11\*</sup>

[1]. BIFI, University of Zaragoza, BIFI-IQFR (CSIC) Joint Unit, Mariano Esquillor s/n, Campus Rio Ebro, Edificio I+D, Zaragoza, Spain.

[2]. Departments of Biochemistry, Pediatrics and Chemistry, Case Western Reserve University, Cleveland, OHIO, USA

[3]. UCIBIO, REQUIMTE, Departamento de Química, Faculdade de Ciências e Tecnologia, Universidade de Nova de Lisboa, Caparica, Portugal.

[4]. CIC bioGUNE, Bizkaia Technology Park, Building 801A, 48170 Derio, Spain; Departament of Organic Chemistry II, Faculty of Science & Technology, University of the Basque Country, 48940 Leioa, Bizkaia, Spain

[5]. Copenhagen Center for Glycomics, Department of Cellular and Molecular Medicine, School of Dentistry, University of Copenhagen, Copenhagen, Denmark.

[6]. Departament de Química Inorgànica i Orgànica (secció de Química Orgànica) & Institut de Química Teòrica i Computacional (IQTUB), Universitat de Barcelona, Martí i Franquès 1, 08028 Barcelona, Spain.

[7]. Departamento de Química, Universidad de La Rioja, Centro de Investigación en Síntesis Química, E-26006 Logroño, Spain.

[8] Instituto de Química Médica, IQM-CSIC, 28006 Madrid, Spain.

[9]. Ikerbasque, Basque Foundation for Science, Maria Diaz de Haro 13, 48009 Bilbao, Spain

[10]. Institució Catalana de Recerca i Estudis Avançats (ICREA), Passeig Lluís Companys, 23, 08010 Barcelona, Spain.

[11]. Fundación ARAID, 50018, Zaragoza, Spain.

[12]. These authors contributed equally to this work.

\* To whom correspondence should be addressed.

E-mail: [rhurtado@bifi.es](mailto:rhurtado@bifi.es) and [txg2@cwru.edu](mailto:txg2@cwru.edu)

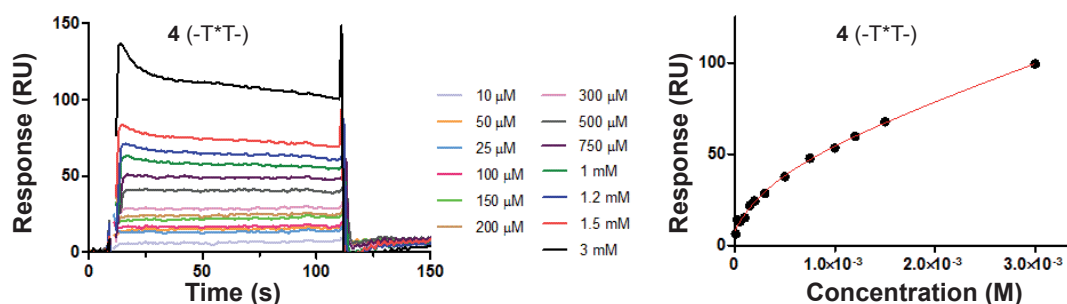

**Figure S1. SPR sensogram of glycopeptide 4 binding to GalNAc-T4.** Sensogram (left) and fitting (right) of SPR data for binding of glycopeptide 4 to GalNAc-T4. Glycopeptide concentrations are reported in the inset legend of the sensogram (left). The end-point values for each injection were plotted against glycopeptide concentration (right). Note that the  $K_d$  could not be determined for peptide 4 because binding saturation could not be achieved. However, the  $K_d$  was accurately determined for glycopeptide 6 as  $70 \pm 15 \mu\text{M}$  (see Figure 1b).

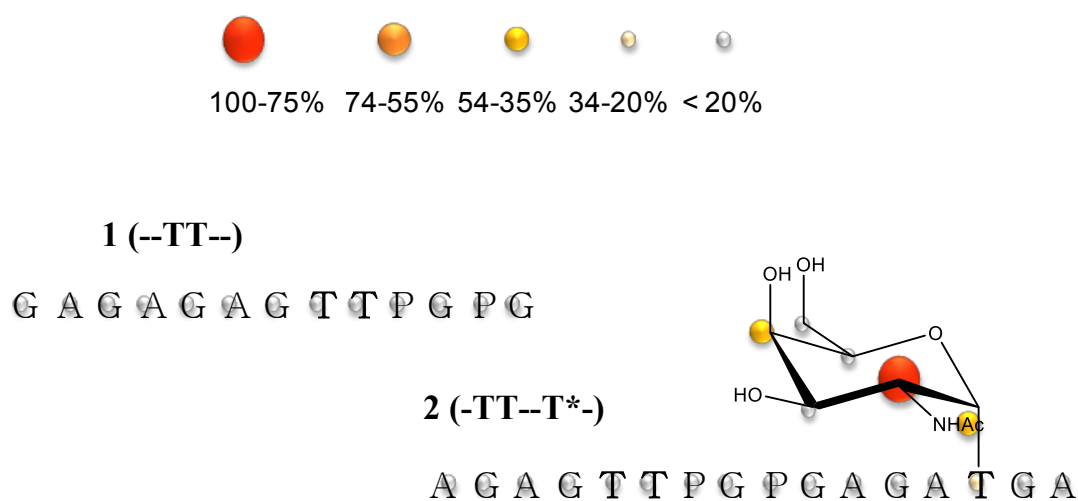

**Figure S2. STD-NMR-derived epitope mapping of compounds 1 and 2 with GalANc-T4.** Data taken from previous studies<sup>1</sup> for comparison to the present work.

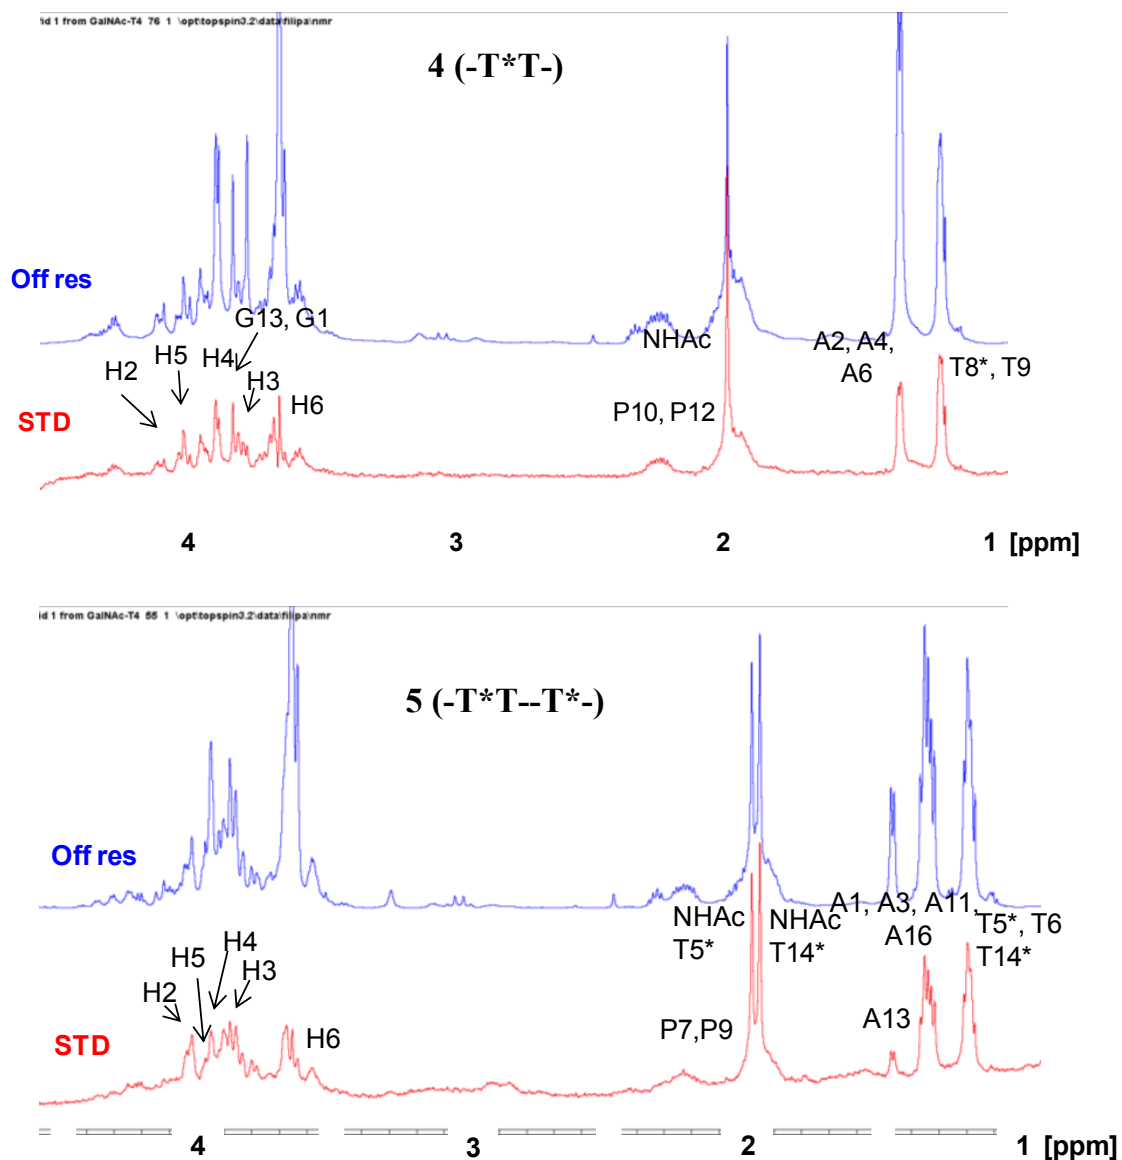

**Figure S3. STD-NMR experiments for glycopeptides 4 and 5.** Spectra obtained at 877.5  $\mu$ M in the presence of GalNAc-T4 (13.5  $\mu$ M), UDP (75  $\mu$ M), MnCl<sub>2</sub> (75  $\mu$ M) at 298 K. The reference spectrum (Off res) is displayed in blue color while the STD spectrum (STD) is displayed in red. The key proton resonances are marked in each STD spectrum.

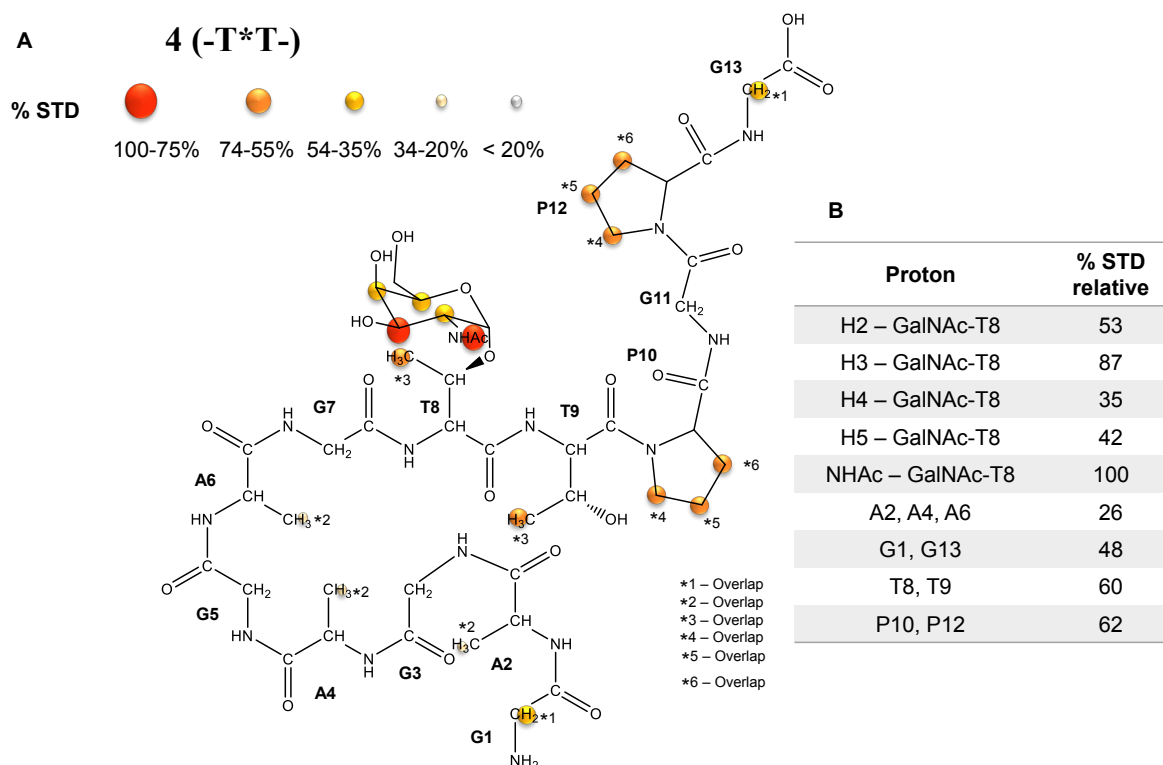

**Figure S4. (a) STD-NMR-derived epitope mapping obtained for 4 (-T\*T-) with GalNAc-T4. Protons** that could not be accurately analyzed in the STD spectrum were not mapped. In particular, the signal of the anomeric proton H1 of GalNAc could not be analyzed in the STD spectra due to their close distance to the HDO resonance, H6 protons could not be analysed in the STD spectra due to Tris buffer interference and the H $\alpha$  of Gly amino acids protons due to their overlap with the sugar protons. The proton resonances that overlap in the spectrum are identified in the figure and displayed with \*. **(b) Relative STD percentages for proton resonances relative to the NHAc methyl.**

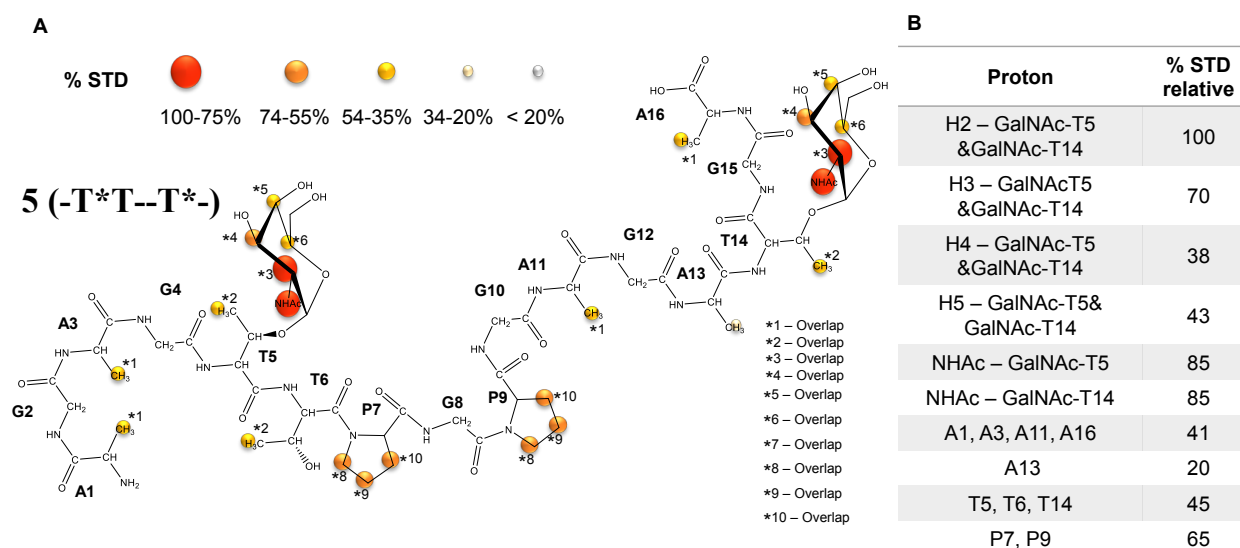

**Figure S5. (a) STD-NMR-derived epitope mapping obtained for 5 (-T\*T-T\*-) with GalNAc-T4. Protons** that could not be accurately analyzed in the STD spectrum were not mapped. In particular, the signal of the anomeric proton H1 of GalNAc could not be analyzed in the STD spectra due to their close distance to the HDO resonance, H6 protons could not be analysed in the STD spectra due to Tris buffer interference and the H $\alpha$  of Gly amino acids protons due to their overlap

with the sugar protons. The proton resonances that overlap in the spectrum are identified in the figure and displayed with \*. **(b)** Relative STD percentages for proton resonances relative to the overlapping H2 GalNAc protons.

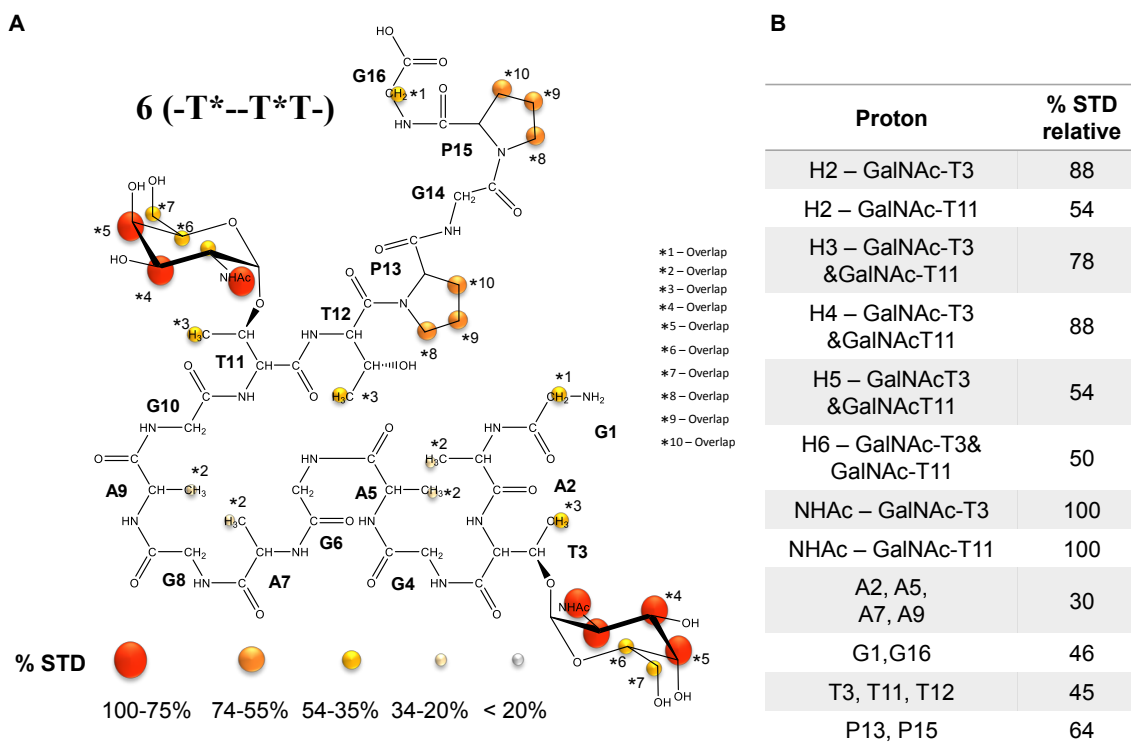

**Figure S6. (a) STD-NMR-derived epitope mapping obtained for 6 (-T\*-T\*T-) with GalNAc-T4.** Protons that could not be accurately analyzed in the STD spectrum were not mapped. In particular, the signal of the anomeric proton H1 of GalNAc could not be analyzed in the STD spectra due to their close distance to the HDO resonance, H6 protons could not be analysed in the STD spectra due to Tris buffer interference and the H $\alpha$  of Gly amino acids protons due to their overlap with the sugar protons. The proton resonances that overlap in the spectrum are identified in the figure and display with \*. **(b)** Relative STD percentages for proton resonances relative to the NHAc methyl.

**Table S1. <sup>1</sup>H-NMR assignments of glycopeptide 4 (-T\*T-) in H<sub>2</sub>O/D<sub>2</sub>O (90:10) at 278K.**

| <b>Residue</b>              | <b>Proton</b> | <b>δ ppm</b> |
|-----------------------------|---------------|--------------|
| <b>T8*</b><br><b>GalNAc</b> | H1            | 4.473        |
|                             | H2            | 3.859        |
|                             | H3            | 3.564        |
|                             | H4            | 3.648        |
|                             | H5            | 3.705        |
|                             | H6            | 3.436        |
|                             | NHAC          | 1.742        |
| <b>G1</b>                   | H             | 8.426        |
|                             | QA            | 3.581        |
| <b>A2</b>                   | H             | 7.977        |
|                             | QB            | 1.086        |
|                             | HA            | 4.010        |
| <b>G3</b>                   | H             | 8.221        |
|                             | QA            | 3.687        |
| <b>A4</b>                   | H             | 8.125        |
|                             | QB            | 1.114        |
|                             | HA            | 4.026        |
| <b>G5</b>                   | H             | 8.302        |
|                             | QA            | 3.631        |
| <b>A6</b>                   | H             | 7.985        |
|                             | HA            | 4.031        |
|                             | QB            | 1.103        |
| <b>G7</b>                   | H             | 8.196        |
|                             | QA            | 3.737        |
| <b>T8*</b>                  | H             | 8.269        |
|                             | HA            | 4.343        |
|                             | HB            | 4.026        |
|                             | QG2           | 0.919        |
| <b>T9</b>                   | H             | 8.199        |
|                             | HA            | 4.293        |
|                             | QG2           | 0.953        |
| <b>P10</b>                  | HD3           | 3.358        |
|                             | HA            | 4.104        |
|                             | HD2           | 3.335        |
|                             | QB            | 1.977        |
|                             | QG            | 1.689        |
| <b>G11</b>                  | H             | 8.186        |
|                             | QA            | 3.765        |
| <b>P12</b>                  | HD3           | 3.497        |
|                             | HA            | 4.116        |
|                             | HD2           | 3.458        |
|                             | HB3           | 2.033        |
|                             | HB2           | 2.020        |
|                             | HG3           | 1.763        |
|                             | HG2           | 1.753        |
| <b>G13</b>                  | H             | 8.411        |
|                             | QA            | 3.593        |

Table S2. <sup>1</sup>H-NMR assignments of glycopeptide 5 (-T\*T—T\*-) in H<sub>2</sub>O/D<sub>2</sub>O (90:10) at 278K.

| Residue                      | Proton | δ ppm  |
|------------------------------|--------|--------|
| <b>T5*</b><br><b>GalNAc</b>  | H1     | 4.651  |
|                              | H2     | 3.924  |
|                              | H3     | 3.666  |
|                              | H4     | 3.714  |
|                              | H5     | 3.765  |
|                              | H6     | 3.435  |
|                              | NHAc   | 17.474 |
| <b>T14*</b><br><b>GalNAc</b> | H1     | 4.481  |
|                              | H2     | 3.924  |
|                              | H3     | 3.666  |
|                              | H4     | 3.714  |
|                              | H5     | 3.765  |
|                              | H6     | 3.435  |
|                              | NHAc   | 17.197 |
| <b>A1</b>                    | H      | 8.170  |
|                              | QB     | 1.095  |
|                              | HA     | 3.947  |
| <b>G2</b>                    | H      | 8.440  |
|                              | QA     | 3.715  |
| <b>A3</b>                    | H      | 8.262  |
|                              | QB     | 1.112  |
|                              | HA     | 4.049  |
| <b>G4</b>                    | H      | 8.279  |
|                              | QA     | 3.710  |
| <b>T5*</b>                   | H      | 8.335  |
|                              | QG2    | 0.950  |
|                              | HB     | 4.022  |
|                              | HA     | 4.339  |
| <b>T6</b>                    | H      | 8.193  |
|                              | QG2    | 0.972  |
|                              | HB     | 3.877  |
|                              | HA     | 4.291  |
| <b>P7</b>                    | HD3    | 3.513  |
|                              | HA     | 4.114  |
|                              | HD2    | 3.449  |
|                              | QB     | 2.014  |
|                              | QD     | 1.712  |
| <b>G8</b>                    | H      | 8.199  |
|                              | QA     | 3.688  |
| <b>P9</b>                    | HA     | 4.137  |
|                              | QD     | 3.345  |
|                              | QB     | 1.979  |
|                              | QG     | 1.696  |
|                              |        |        |

| Residue     | Proton | δ ppm |
|-------------|--------|-------|
| <b>G10</b>  | H      | 8.364 |
|             | QA     | 3.635 |
| <b>A11</b>  | H      | 7.939 |
|             | HA     | 4.173 |
| <b>G12</b>  | QB     | 1.122 |
|             | H      | 8.248 |
| <b>A13</b>  | QA     | 3.629 |
|             | H      | 7.899 |
|             | QB     | 1.138 |
| <b>T14*</b> | HA     | 4.183 |
|             | H      | 8.287 |
|             | HA     | 4.302 |
|             | HB     | 4.070 |
| <b>G15</b>  | QG2    | 0.977 |
|             | H      | 8.150 |
| <b>A16</b>  | QA     | 3.602 |
|             | H      | 8.027 |
|             | QB     | 1.133 |
|             | HA     | 3.995 |

Table S3. <sup>1</sup>H-NMR assignments of glycopeptide 6 (-T\*--T\*T-) in H<sub>2</sub>O/D<sub>2</sub>O (90:10) at 278K.

| Residue                      | Proton | δ ppm  |
|------------------------------|--------|--------|
| <b>T3*</b><br><b>GalNAc</b>  | H1     | 4.469  |
|                              | H2     | 3.853  |
|                              | H3     | 3.569  |
|                              | H4     | 3.641  |
|                              | H5     | 3.708  |
|                              | H6     | 3.442  |
|                              | NHAC   | 17.675 |
| <b>T11*</b><br><b>GalNAc</b> | H1     | 4.682  |
|                              | H2     | 3.762  |
|                              | H3     | 3.569  |
|                              | H4     | 3.641  |
|                              | H5     | 3.708  |
|                              | H6     | 3.442  |
|                              | NHAC   | 1.742  |
| <b>G1</b>                    | H      | 8.430  |
|                              | QA     | 3.586  |
| <b>A2</b>                    | H      | 8.430  |
|                              | HA     | 4.226  |
|                              | QB     | 1.130  |
| <b>T3*</b>                   | H      | 8.494  |
|                              | HA     | 4.282  |
|                              | HB     | 4.035  |
|                              | QG2    | 0.969  |
| <b>G4</b>                    | H      | 8.244  |
|                              | QA     | 3.668  |
| <b>A5</b>                    | H      | 8.236  |
|                              | HA     | 3.979  |
|                              | QB     | 1.087  |
| <b>G6</b>                    | H      | 8.320  |
|                              | QA     | 3.612  |
| <b>A7</b>                    | H      | 8.040  |
|                              | HA     | 3.991  |
|                              | QB     | 1.074  |
| <b>G8</b>                    | H      | 8.264  |
|                              | QA     | 3.651  |
| <b>A9</b>                    | H      | 7.945  |
|                              | HA     | 4.028  |
|                              | QB     | 1.105  |

| Residue     | Proton | δ ppm |
|-------------|--------|-------|
| <b>G10</b>  | H      | 8.203 |
|             | QA     | 3.746 |
| <b>T11*</b> | H      | 8.260 |
|             | HA     | 4.343 |
|             | HB     | 4.041 |
|             | QG2    | 0.952 |
| <b>T12</b>  | H      | 8.195 |
|             | HA     | 4.294 |
|             | QG2    | 0.964 |
| <b>P13</b>  | HA     | 4.128 |
|             | HD3    | 3.495 |
|             | QB     | 2.013 |
|             | QG     | 1.709 |
|             | HD2    | 3.453 |
|             |        |       |
| <b>G14</b>  | H      | 8.189 |
|             | QA     | 3.846 |
| <b>P15</b>  | HA     | 4.101 |
|             | QG     | 1.718 |
|             | QB     | 1.982 |
|             | HD3    | 3.366 |
|             | HD2    | 3.335 |
| <b>G16</b>  | H      | 8.415 |
|             | QA     | 3.591 |



**Table S4. Data collection and refinement statistics.** Values in parentheses refer to the highest resolution shell. Ramachandran plot statistics were determined with PROCHECK.

|                                                                                       | GalNAc-T4 in complex with the peptide <b>6</b> and UDP/Mn <sup>+2</sup>         |
|---------------------------------------------------------------------------------------|---------------------------------------------------------------------------------|
| Space group                                                                           | P1                                                                              |
| Wavelength (Å)                                                                        | 0.97                                                                            |
| Resolution (Å)                                                                        | 20-1.80<br>(1.90-1.80)                                                          |
| Cell dimensions<br>a, b, c (Å)<br>$\alpha$ , $\beta$ , $\gamma$ (°)                   | <i>a</i> = 66.09<br><i>b</i> = 81.33<br><i>c</i> = 84.86<br>65.55, 68.66, 74.31 |
| Mn(I) half-set correlation CC(1/2)                                                    | 0.998 (0.529)                                                                   |
| Unique reflections                                                                    | 133764                                                                          |
| Completeness                                                                          | 97.3 (95.6)                                                                     |
| $R_{pim}$                                                                             | 0.044 (0.742)                                                                   |
| $I/\sigma(I)$                                                                         | 9.2 (0.9)                                                                       |
| Redundancy                                                                            | 3.7 (3.8)                                                                       |
| $R_{work} / R_{free}$                                                                 | 0.189/0.238                                                                     |
| RMSD from ideal geometry, bonds (Å)                                                   | 0.014                                                                           |
| RMSD from ideal geometry, angles (°)                                                  | 1.823                                                                           |
| $\langle B \rangle$ GalNAc-T4 (Å <sup>2</sup> )                                       | 54.31                                                                           |
| $\langle B \rangle$ UDP (Å <sup>2</sup> )                                             | 38.48                                                                           |
| $\langle B \rangle$ Peptide <b>6</b> (Å <sup>2</sup> )                                | 66.49                                                                           |
| $\langle B \rangle$ solvent (Å <sup>2</sup> )                                         | 52.86                                                                           |
| $\langle B \rangle$ Ethylenglycol(Å <sup>2</sup> )                                    | 68.01                                                                           |
| $\langle B \rangle$ Glycerol (Å <sup>2</sup> )                                        | 79.02                                                                           |
| Ramachandran plot:<br>Most favoured (%)<br>Additionally allowed (%)<br>Disallowed (%) | 95.14<br>3.69<br>1.17                                                           |
| PDB ID                                                                                | 6H0B                                                                            |

**Table S5. HPLC and MS Characterization Glycopeptides 4, 5 and 6**

**Peptide 4** GAGAGAGT\*TPGPG: HPLC:  $R_t = 10.73$  min (Grad: water 0.1% TFA/acetonitrile (95:5)  $\rightarrow$  (85.6:14.4), 15 min,  $\lambda = 212$  nm). HRMS ESI+ (m/z) calcd. for  $C_{47}H_{78}N_{15}O_{20}$   $[M+H]^+$  1172.5542, found 1172.5494.

**Peptide 5:** AGAGT\*TPGPGAGAT\*GA: HPLC:  $R_t = 11.62$  min (Grad: water 0.1% TFA/acetonitrile (95:5)  $\rightarrow$  (86.3:13.7), 14 min,  $\lambda = 212$  nm). HRMS ESI+ (m/z) calcd. for  $C_{65}H_{109}N_{19}O_{29}$   $[M+2H]^{2+}$  809.8814, found 809.8829.

**Peptide 6** GAT\*GAGAGAGT\*TPGPG: HPLC:  $R_t = 11.20$  min (Grad: water 0.1% TFA/acetonitrile (95:5)  $\rightarrow$  (86.3:13.7), 14 min,  $\lambda = 212$  nm). HRMS ESI+ (m/z) calcd. for  $C_{64}H_{107}N_{19}O_{29}$   $[M+2H]^{2+}$  802.8736, found 802.8743.

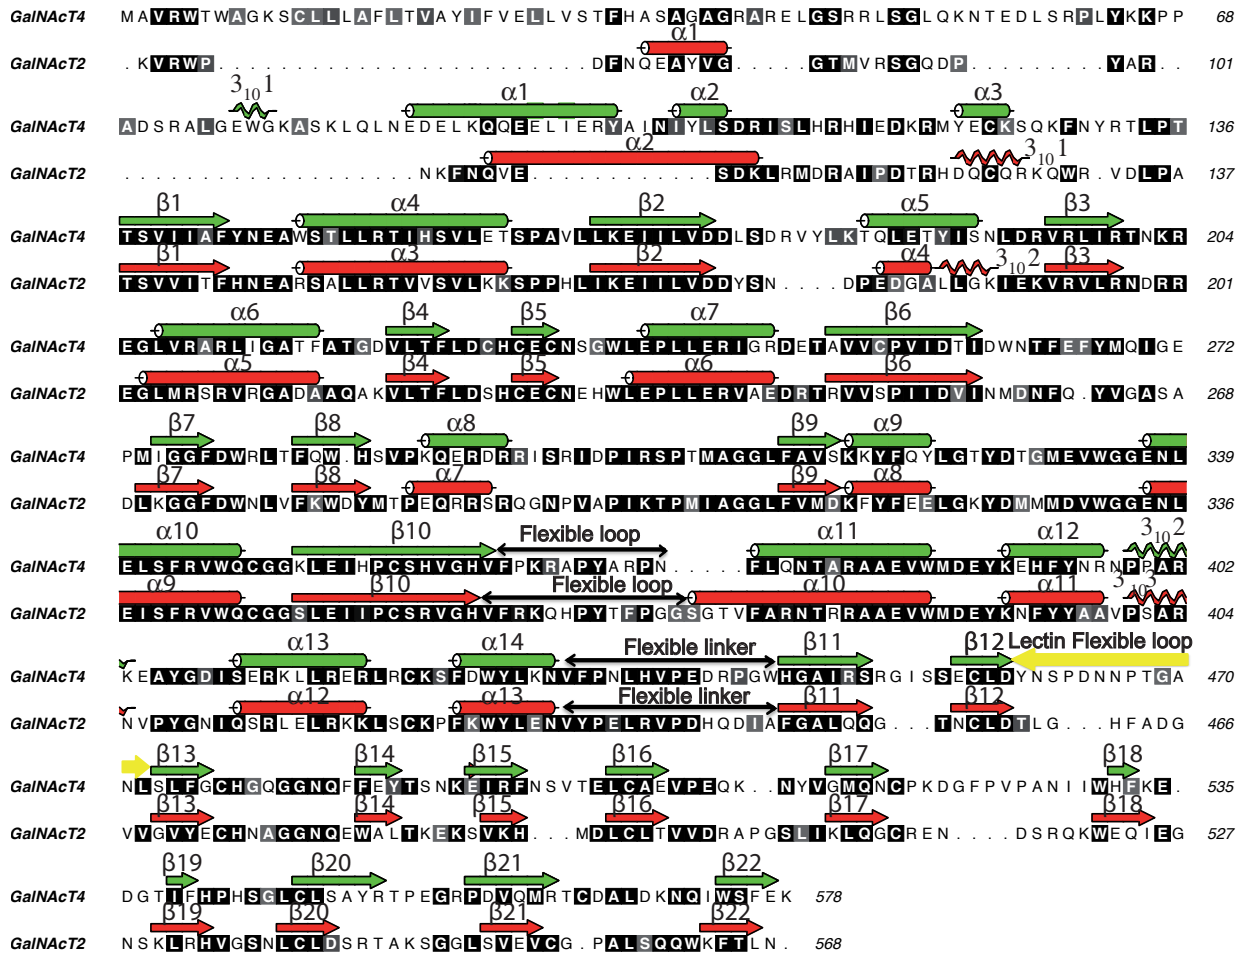

**Figure S7. Sequence alignment of human GalNAc-T2 and GalNAc-T4.** Secondary structure elements from the GalNAc-T2 and T4 structures are shown, with  $\alpha$ -helices,  $3_{10}$ -helices and  $\beta$ -strands in red and green, respectively. The regions encompassing the flexible loop and linker are indicated with double sided arrows. The yellow arrow indicates the residues encompassing the lectin flexible loop.

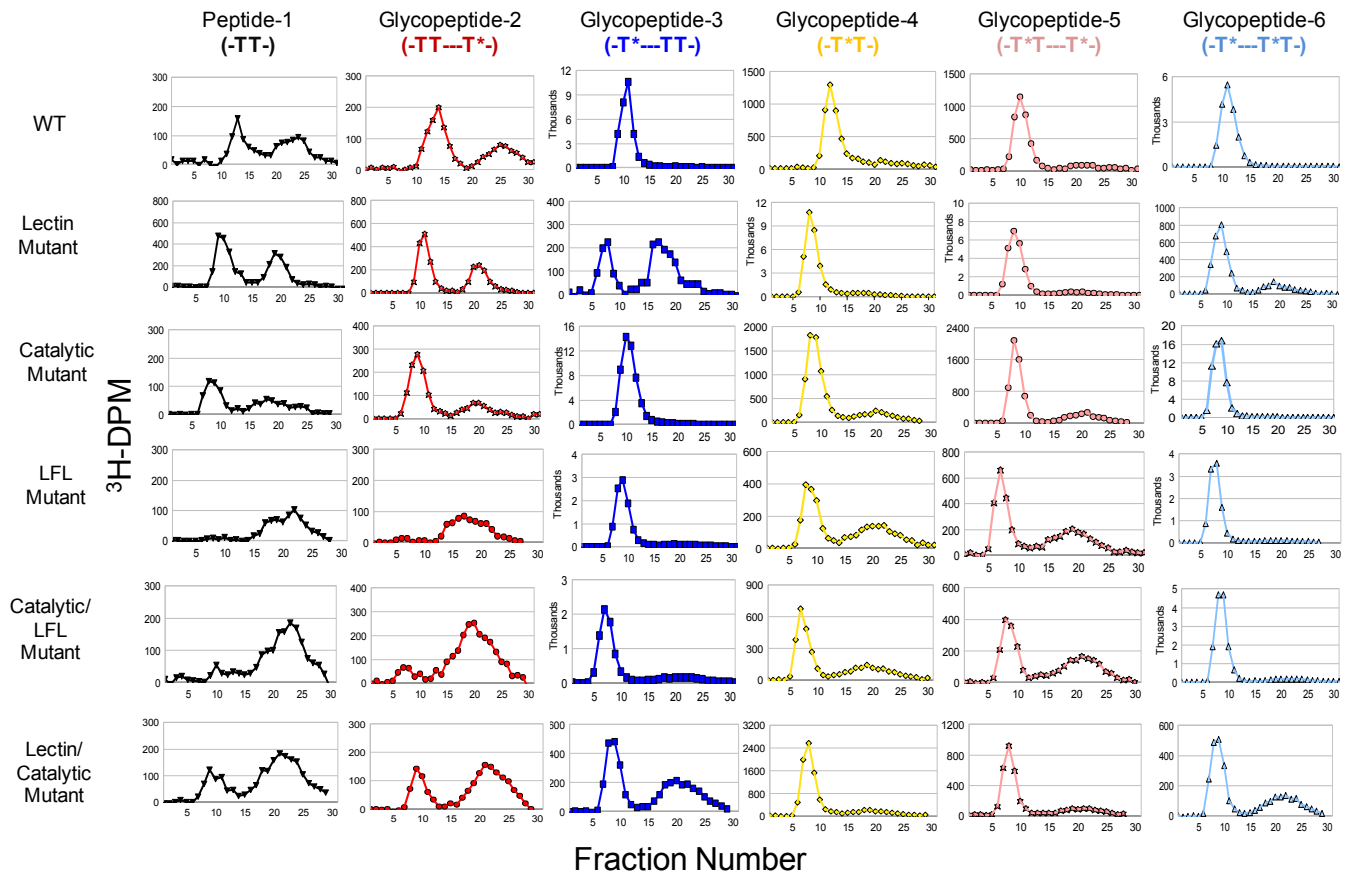

### UDP-GalNAc Hydrolysis

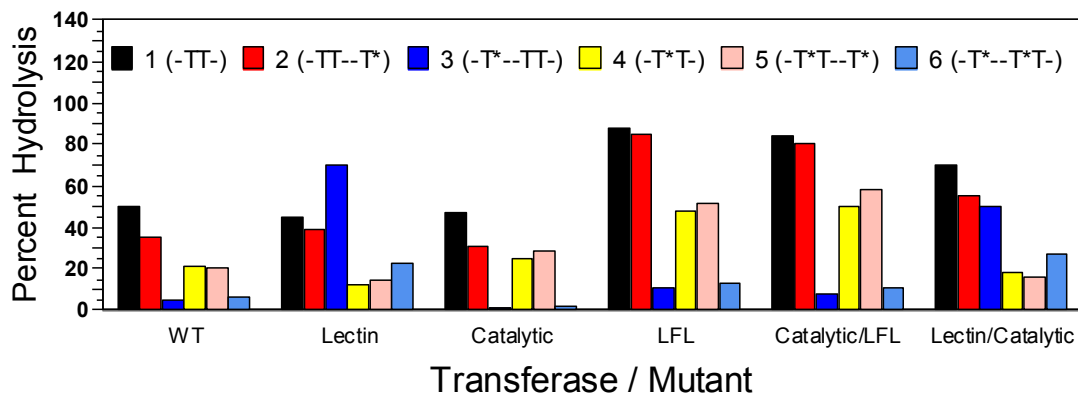

**Figure S8. Determination of UDP-<sup>3</sup>H-GalNAc hydrolysis.** **Top Panels:** Representative Sephadex G10 chromatograms showing extent of UDP-GalNAc hydrolysis. Columns represent each (glyco)peptide substrate while rows represent GalNAc-T4 transferase construct. Transferase reaction products (after Dowex-1X8) were applied to Sephadex G10 chromatography and the eluted fractions counted for <sup>3</sup>H-activity. Note the first eluting peak represents transfer to (glyco)peptide while the second eluting peak represents transfer to water (i.e. free <sup>3</sup>H-GalNAc). **Bottom Panel: Summary of UDP-<sup>3</sup>H-GalNAc hydrolysis.** Average hydrolysis for each substrate and transferase combination obtained from 2 to 5 individual Sephadex G10 determinations.

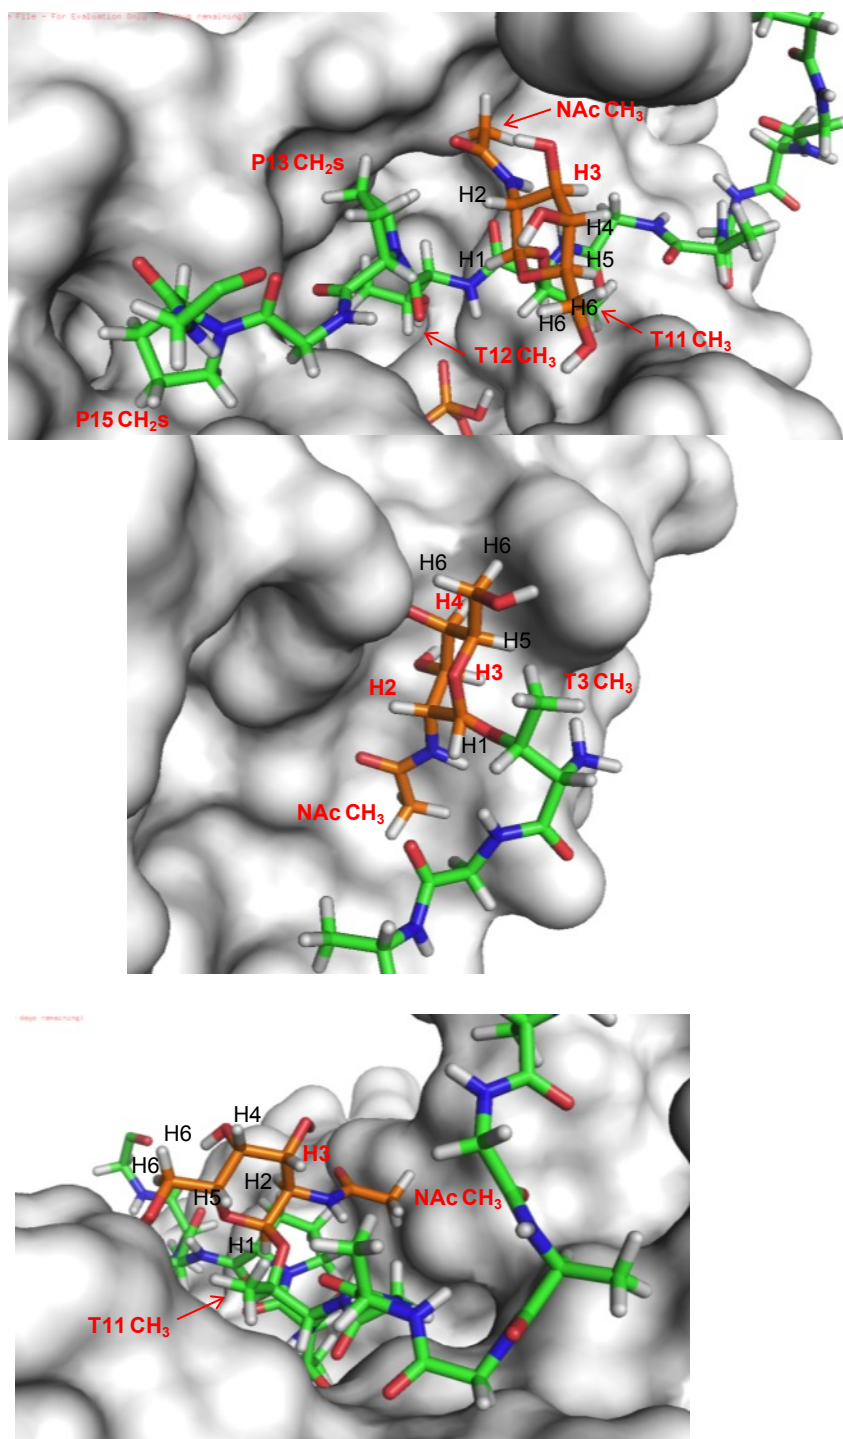

**Figure S9. STD-NMR enhancements for glycopeptides 3 and 4 mapped onto the structure of glycopeptide 6 bound to GalNAc-T4.** Top and center figures show the catalytic domain bound -T\*TPGP- sequence with the protons labeled in red exhibiting STD-NMR enhancements in glycopeptide 4 (Figure S4). Bottom figure displays the lectin domain bound GalNAc STD-NMR enhancements, labeled in red, observed for glycopeptide 3<sup>2</sup>. The STD-NMR enhancements and structure of bound glycopeptide 6 are consistent with each other demonstrating the different catalytic and lectin domain binding modes for the GalNAc residue.

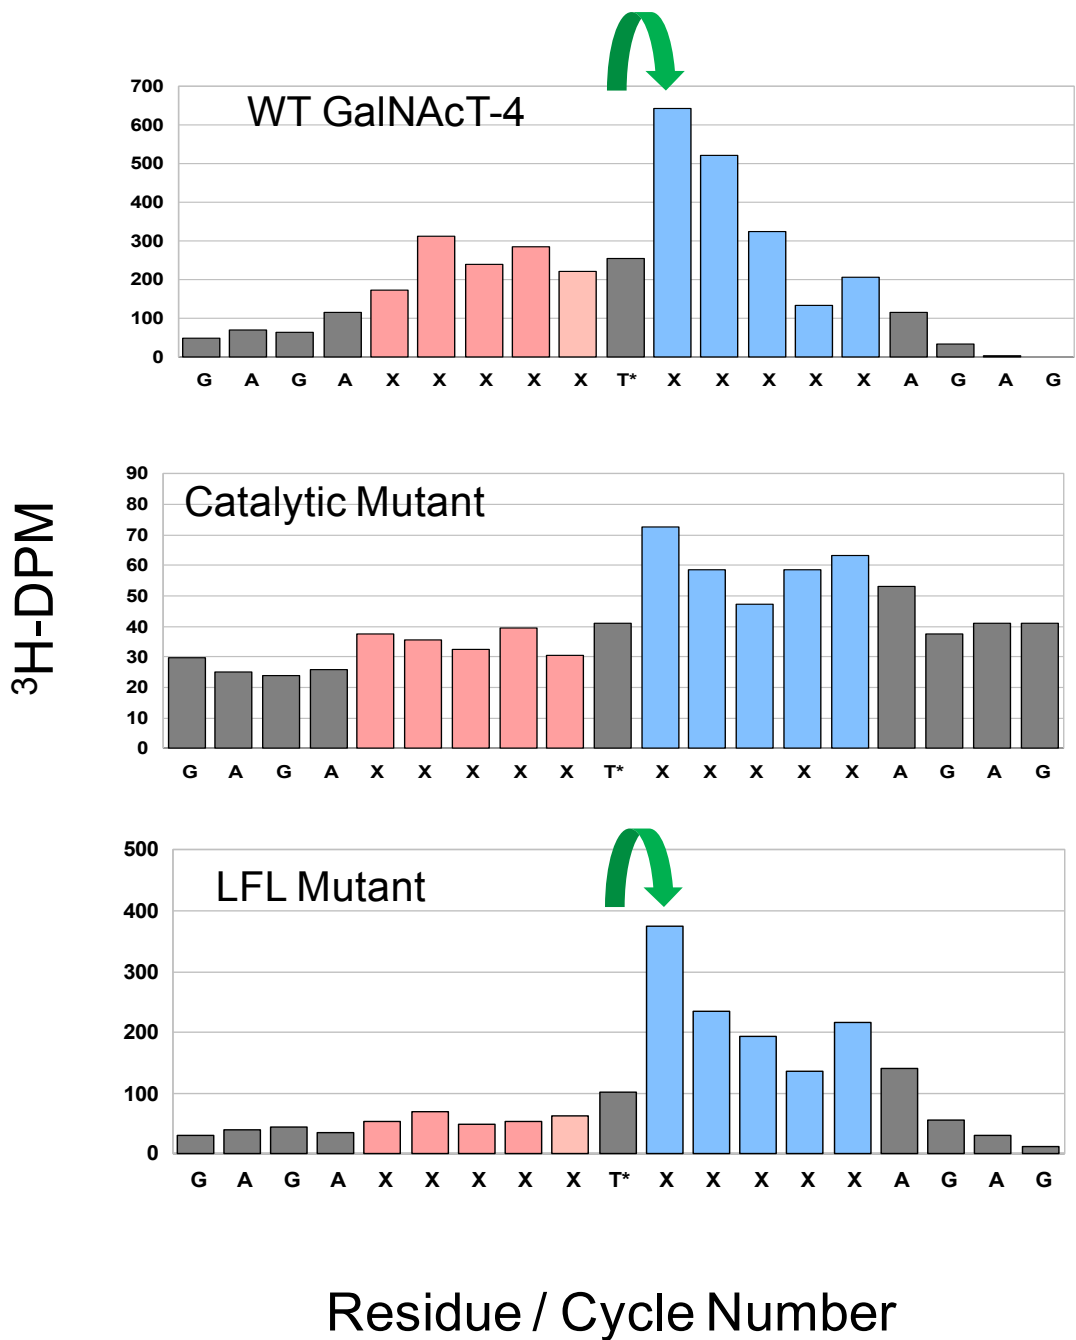

**Figure S10. Neighboring glycosylation preferences of GalNAc-T4 and its catalytic and LFL mutants.** Random glycopeptide GPIID GAGAXXXXXT\*XXXXXAGAG (X= GARPNEYV & T) was glycosylated by the indicated transferases and Edman amino acid sequenced (after Sephadex G10 gel filtration) to determine the sites of incorporation of <sup>3</sup>H-GalNAc. Pink and light blue bars represent the possible sites of Thr residue glycosylation. Note that Thr acceptor residues are present in all of the random X sites. The green arrow represents the observed prior neighboring glycosylation activity of GalNAc-T4.

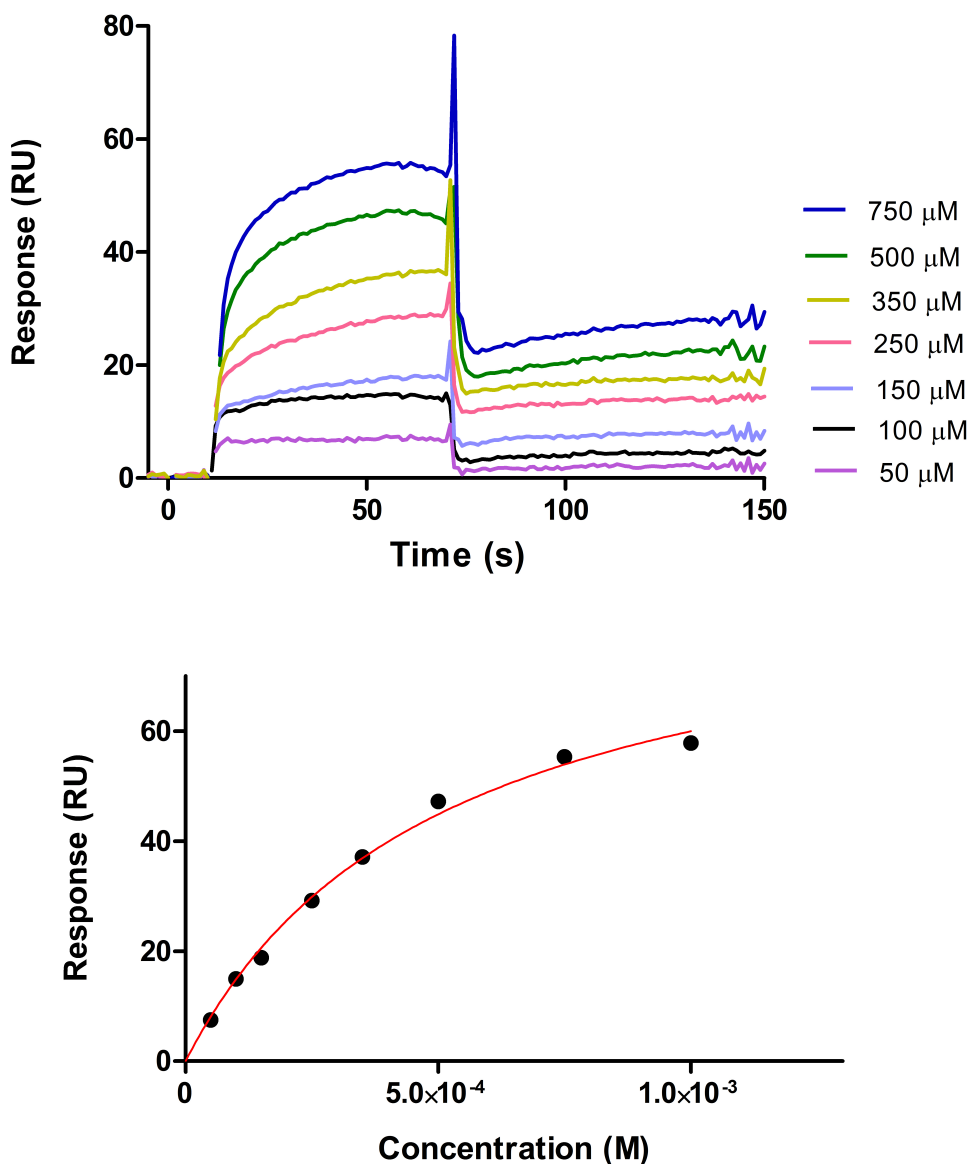

**Figure S11. SPR sensogram of glycopeptide 6 binding to the GalNAc-T4 catalytic mutant.** Sensogram (top) and fitting (bottom) of SPR data for the binding of glycopeptide 6 to the catalytic domain mutant of GalNAc-T4. Glycopeptide ligand concentrations are reported in the inset legend of the sensogram (top). End-point values after each injection were plotted against glycopeptide concentration which were fit to a  $K_d$  of  $435 \mu\text{M} \pm 87 \mu\text{M}$  (solid line, bottom plot).

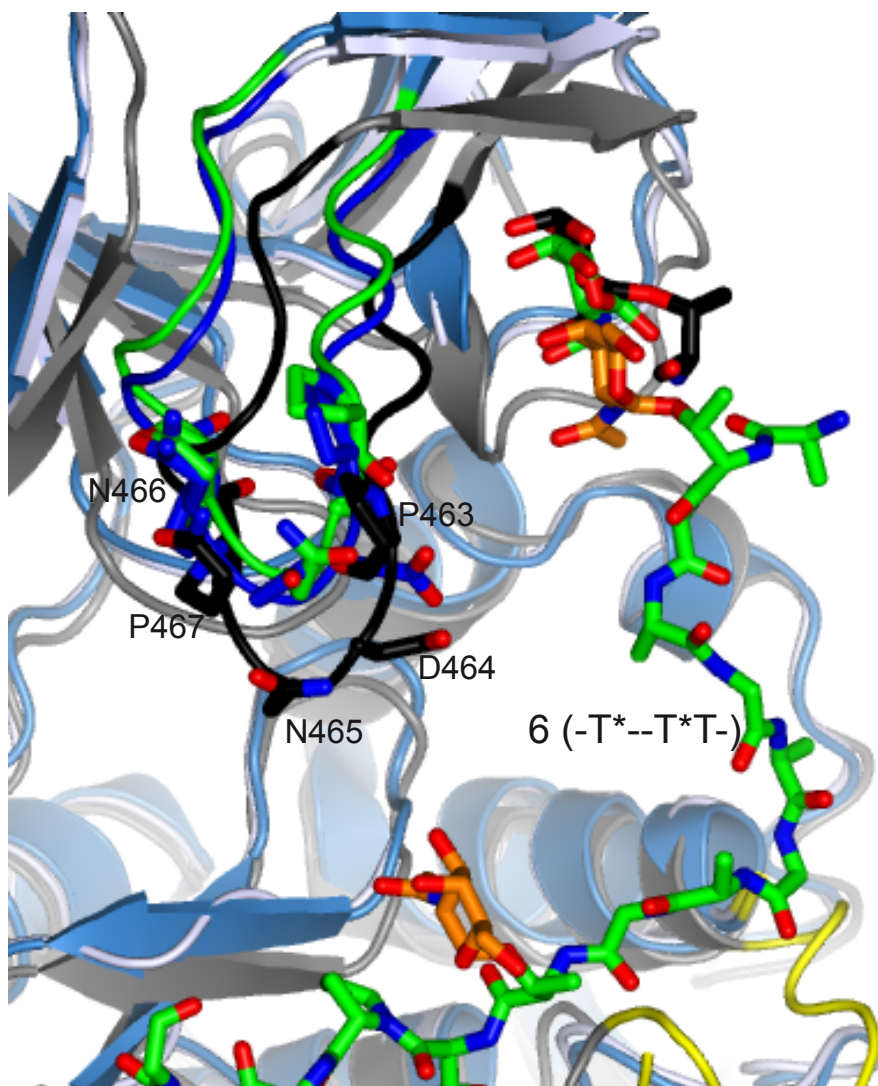

**Figure S12. Conformational changes of the LFL.** The crystal structure of GalNAc-T4 in complex with the peptide **3** was superimposed with the crystal structure of GalNAc-T4 in complex with the peptide **6**. Note that the crystals for both crystal structures have two molecules in the asymmetric unit. For this superposition analysis, we used the two monomers of GalNAc-T4 that were soaked with peptide **3** (LFL in green and blue) whereas we have only used the monomer of GalNAc-T4 in complex with UDP and peptide **6** (LFL in black). Note that for one of the monomers of the GalNAc-T4-peptide **3** complex asymmetric unit is there only electron density visualized for the GalNAc moiety, for the other monomer we visualized Thr3 and its covalently bound GalNAc residue of peptide **3**. The GalNAc moieties of peptide **3** were shown as green (free GalNAc) and black (sugar bound to Thr3) carbon atoms. The GalNAc moieties for peptide **6** were shown as orange carbon atoms. The amino acids of peptide **3** (only Thr3 is visualized) and **6** were shown as black and green carbon atoms, respectively. The residues that are listed in the figure correspond to the LFL of the structure of GalNAc-T4-UDP-peptide **6**. Note that only the residues eliminated and replaced by GGG to generate the LFL mutant are labelled.



Atomic fluctuation ( $C\alpha$ ) analysis of GalNAc-T4 (wildtype and mutant) in complex with a glycopeptide and UDP  
(0.5  $\mu$ s MD simulations in explicit water)

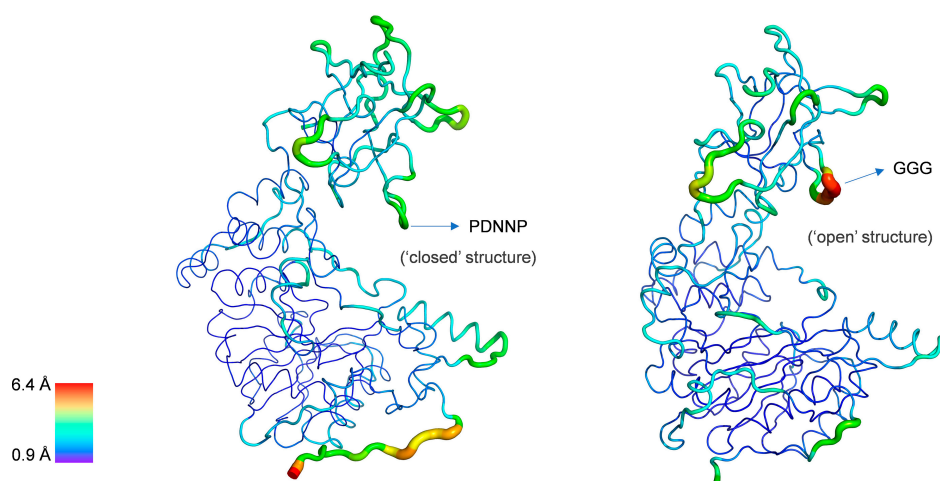

**Figure S13.** Atomic fluctuation ( $C\alpha$ ) analysis of wild-type (left) and LFL mutant (right) obtained from 0.5  $\mu$ s MD simulations.

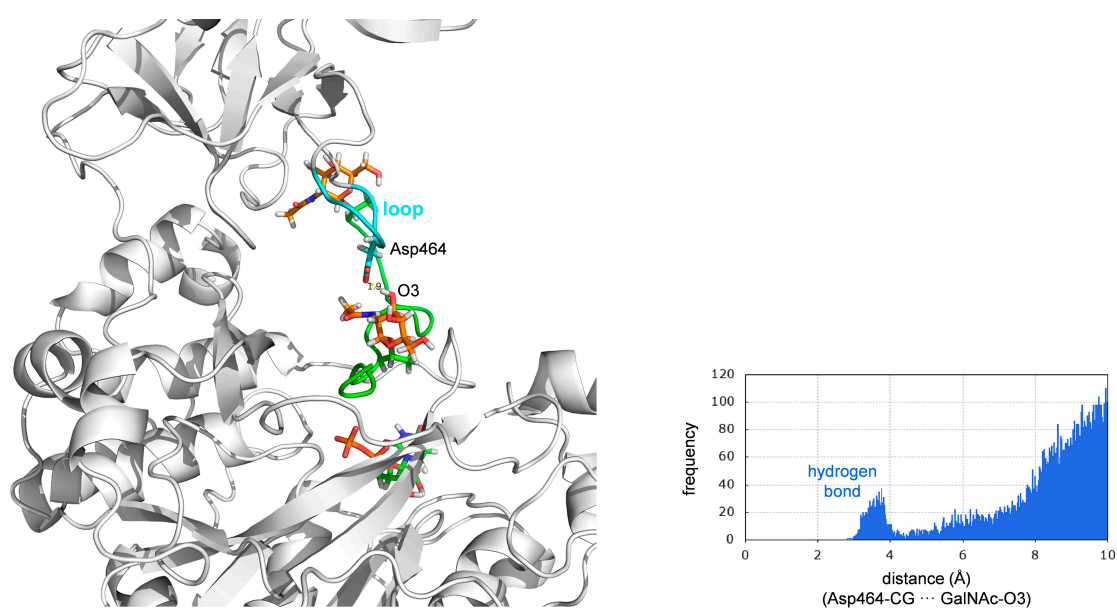

**Figure S14.** (left) An example of a transient hydrogen bond between the peptide 6 GalNAc moiety located in the catalytic domain and Asp464, (right) together with the distribution of the distance between the GalNAc O3 and the carboxylate group of the side chain of Asp464 obtained from 0.5  $\mu$ s MD simulations.

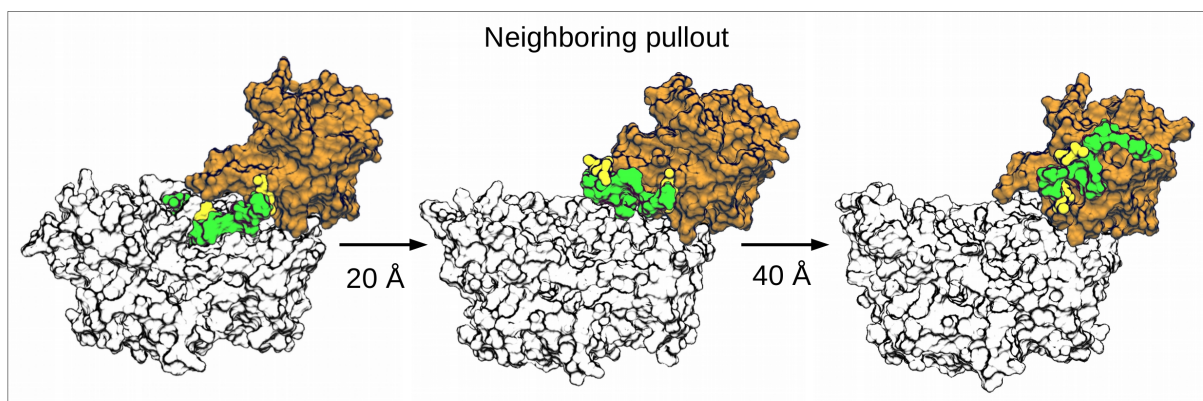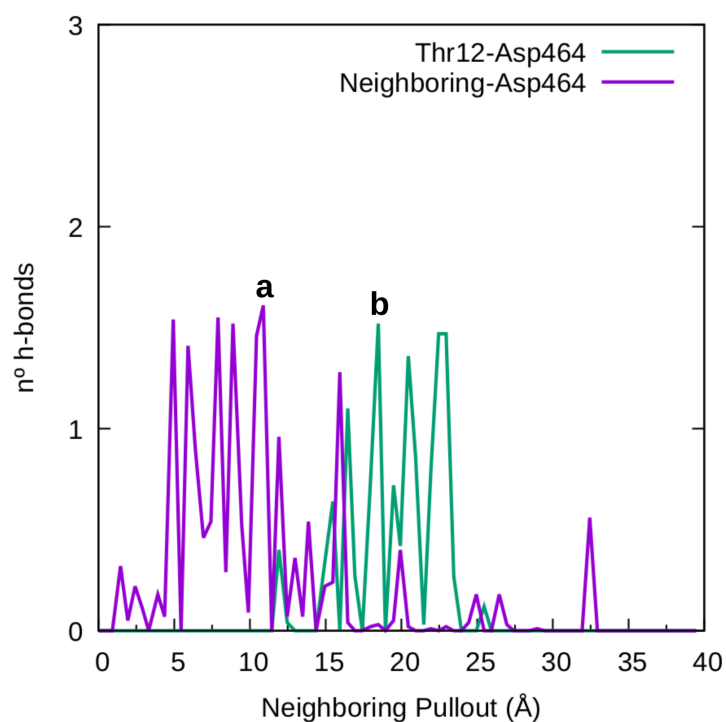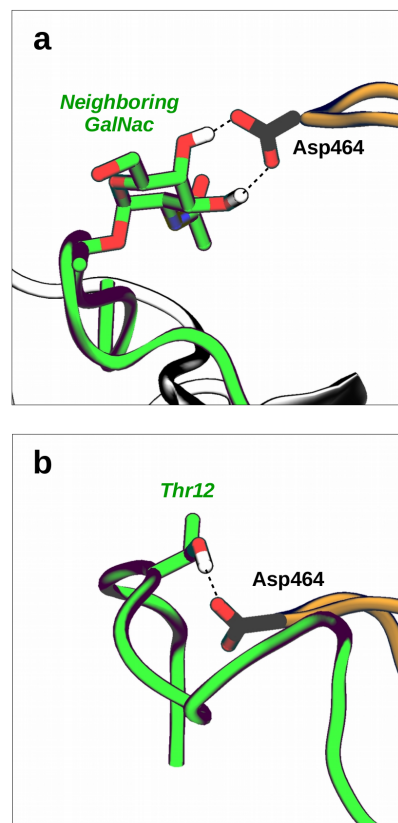

**Figure S15. Pulling out of bound glycopeptide 6 from the catalytic domain of GalNAc-T4.** (Top panel) Molecular motion of the peptide along the pathway. The catalytic domain is represented in white color, the lectin domain in brown, and the peptide and the GalNAc glycans in green and yellow, respectively. (Bottom panel) Mean number of H-bonds between the lectin flexible loop Asp464 and (a) the neighboring Thr11-GalNAc and (b) the Thr12 residue.

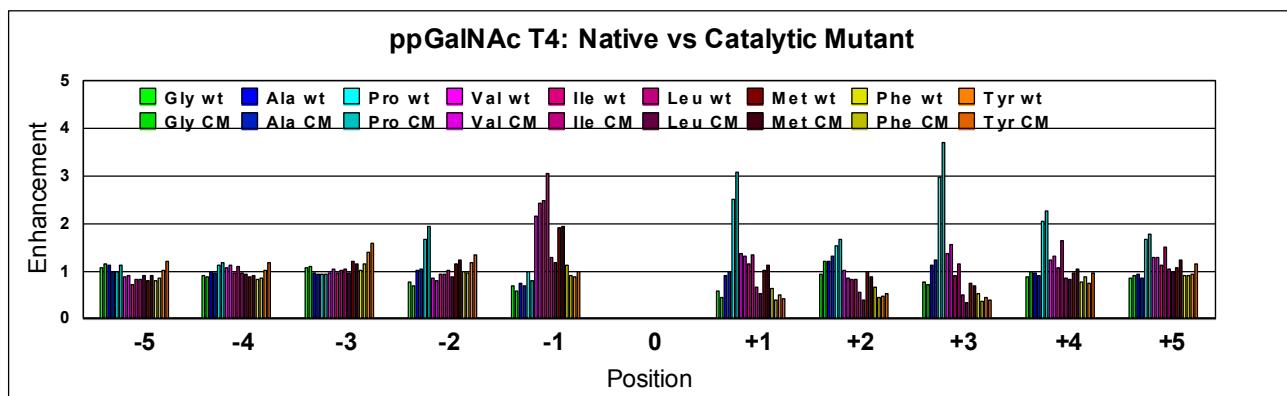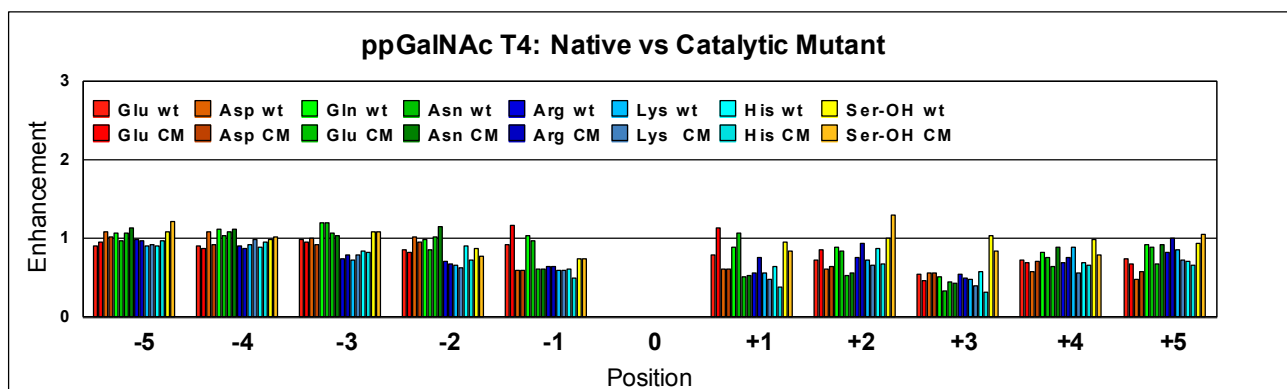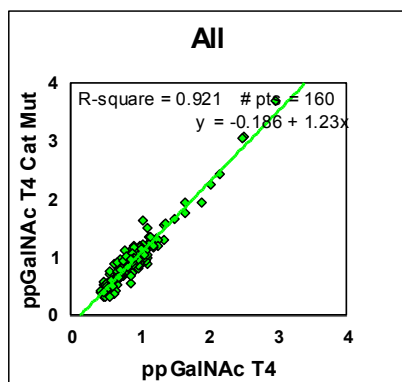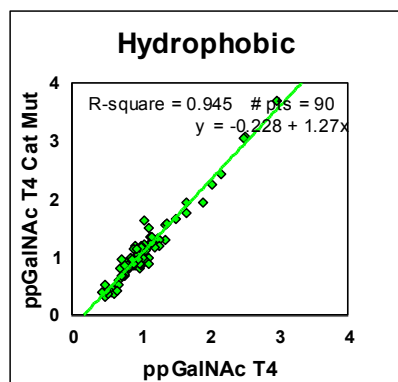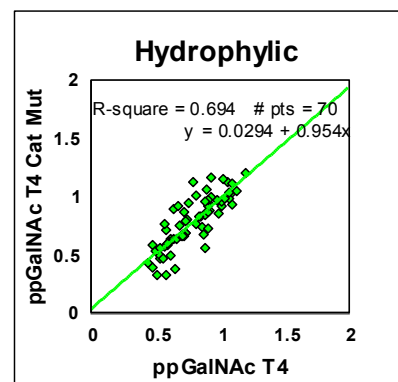

**Figure S16. Comparison of wt and catalytic mutant GalNAc-T4 enhancement values (EV) derived from random peptide substrates.** Comparison plots of hydrophobic residues (top panel) and hydrophilic residues (center panel) are shown. Correlation plots between wt and catalytic mutant transferases are shown at the bottom. Note there are no significant differences between the wt and catalytic mutant preferences. See Methods section for details.

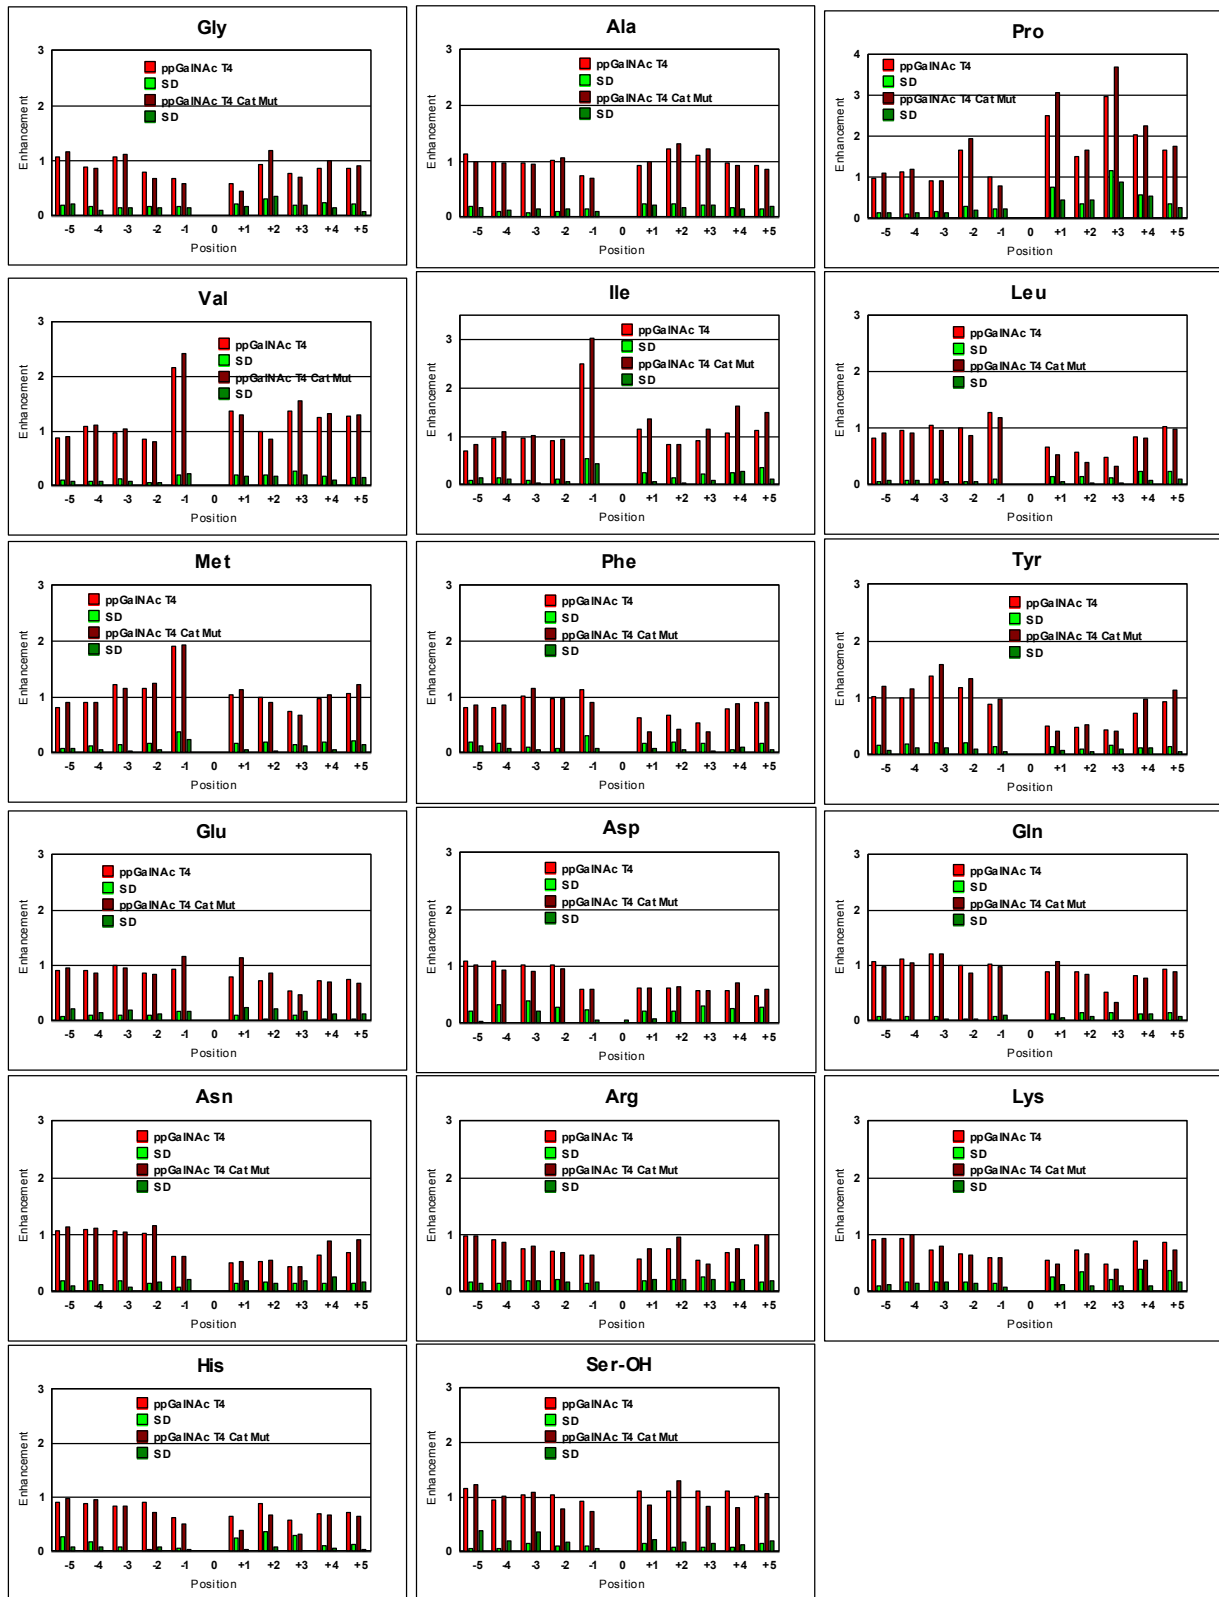

**Figure S17. Comparison of wt and catalytic mutant GalNAc-T4 enhancement values (EV) for each amino acid residue.** Red and brown bars represent wt and catalytic mutant averaged EV's while the the green bars represent their standard deviation (SD), the calculated standard deviation. Note there are no significant differences between the wt and catalytic mutant preferences. See **Methods** section for details.

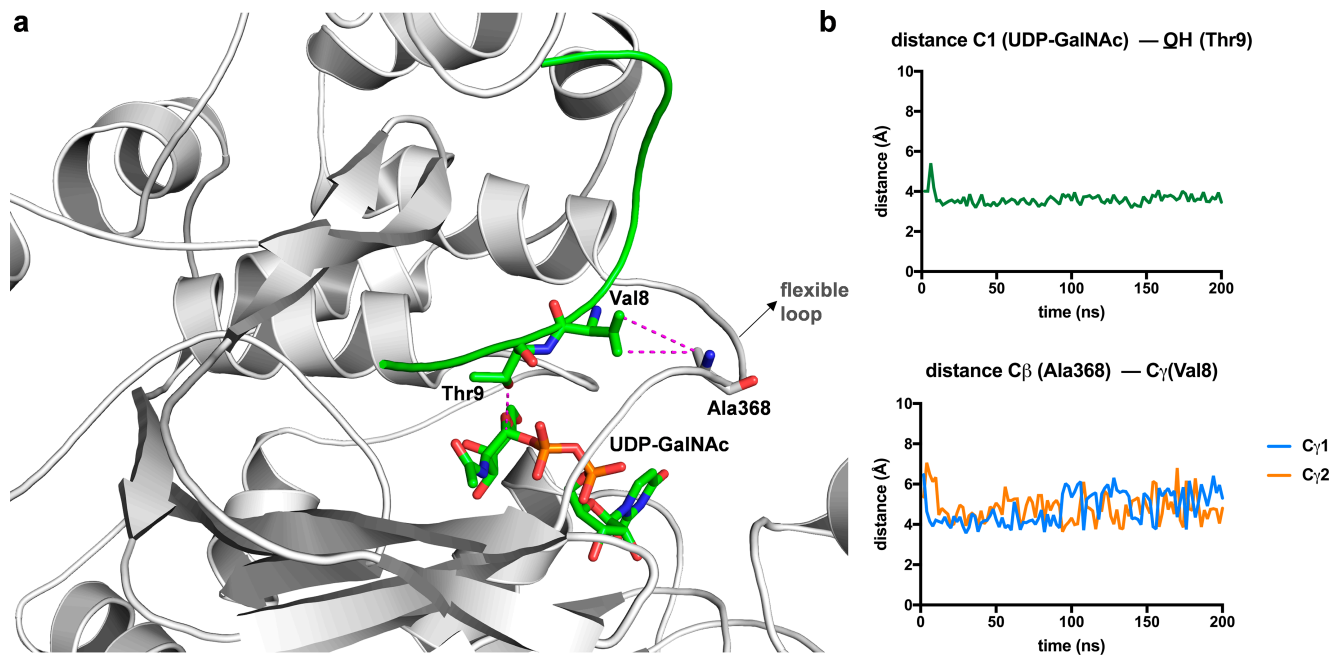

**Figure S18.** (a) A representative frame derived from 200 ns MD simulations illustrating the hydrophobic contacts between the side-chains of Val8 and Ala368. (b) Evolution of the distances between C1 of GalNAc and oxygen of the hydroxyl group of Thr9 (upper panel), together with C $\beta$  of Ala368 and the methyl groups of Val8 (lower panel) along the 200 ns MD simulations.

## REFERENCES

1. Rivas, M. L.; Lira-Navarrete, E.; Daniel, E. J. P.; Companon, I.; Coelho, H.; Diniz, A.; Jimenez-Barbero, J.; Peregrina, J. M.; Clausen, H.; Corzana, F.; Marcelo, F.; Jimenez-Oses, G.; Gerken, T. A.; Hurtado-Guerrero, R., The interdomain flexible linker of the polypeptide GalNAc transferases dictates their long-range glycosylation preferences. *Nature communications* **2017**, *8* (1), 1959.
2. de Las Rivas, M.; Coelho, H.; Diniz, A.; Lira-Navarrete, E.; Companon, I.; Jimenez-Barbero, J.; Schjoldager, K. T.; Bennett, E. P.; Vakhrushev, S. Y.; Clausen, H.; Corzana, F.; Marcelo, F.; Hurtado-Guerrero, R., Structural Analysis of a GalNAc-T2 Mutant Reveals an Induced-Fit Catalytic Mechanism for GalNAc-Ts. *Chemistry* **2018**, *24* (33), 8382-8392.
